# Supplementary material for: Sustainable bioproduction of the blue pigment indigoidine: Expanding the range of heterologous products inR. toruloidesto include non-ribosomal peptides
Source: Royal Society of Chemistry journal article supplement (doi:10.1039/c9gc00920e), 2019-01-01
Supplement: c9gc00920e1.pdf [file c9gc00920e1.pdf]

## Supplementary information

### Sustainable bioproduction of the blue pigment indigoidine: Expanding the range of heterologous products in *Rhodospiridium toruloides* to include non-ribosomal peptides

Maren Wehrs<sup>1,2,3</sup>, John Gladden<sup>3,4</sup>, Yuzhong Liu<sup>1,3</sup>, Lukas Platz<sup>1,3</sup>, Jan-Philip Prah<sup>1,5</sup>, Jadie Moon<sup>1,3</sup>, Gabriella Papa<sup>1,5</sup>, Eric Sundstrom<sup>1,5</sup>, Gina M. Geiselman<sup>1,4</sup>, Deepti Tanjore<sup>1,5</sup>, Jay D. Keasling<sup>1,3,6,7,8,9,10</sup>, Todd Pray<sup>1,5</sup>, Blake A. Simmons<sup>1,3</sup>, Aindrila Mukhopadhyay<sup>1,3,11</sup> \*

<sup>1</sup>Biological Systems and Engineering Division, Lawrence Berkeley National Laboratory, Berkeley, CA 94720, <sup>2</sup>Institut für Genetik, Technische Universität Braunschweig, Braunschweig, Germany, <sup>3</sup>Joint BioEnergy Institute, Lawrence Berkeley National Laboratory, Emeryville, CA 94608, <sup>4</sup>Biological and Engineering Sciences Center, Sandia National Laboratories, 7011 East Avenue, Livermore, California 94551, United States, <sup>5</sup>Advanced Biofuels and Bioproducts process development Unit, Lawrence Berkeley National Laboratory, Emeryville, CA 94608, <sup>6</sup>Department of Plant and Microbial Biology, University of California, Berkeley, CA 94720, USA, <sup>7</sup>Department of Bioengineering, University of California, Berkeley, CA 94720, USA, <sup>8</sup>Department of Chemical and Biomolecular Engineering, University of California, Berkeley, CA 94720, USA, <sup>9</sup>The Novo Nordisk Foundation Center for Biosustainability, Technical University of Denmark, Denmark, <sup>10</sup>Synthetic Biochemistry Center, Institute for Synthetic Biology, Shenzhen Institutes for Advanced Technologies, Shenzhen, China <sup>11</sup>Environmental Genomics and Systems Biology Division, Lawrence Berkeley National Laboratory, Berkeley, CA 94720

\*Corresponding author

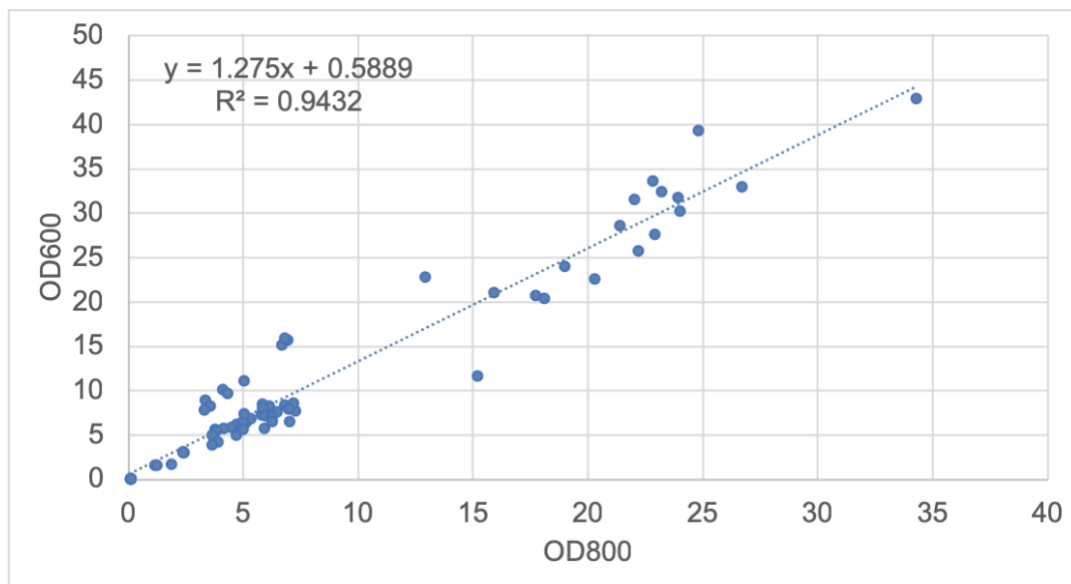

**Fig. S1** Correlation of OD<sub>800</sub> and OD<sub>600</sub> measurements.

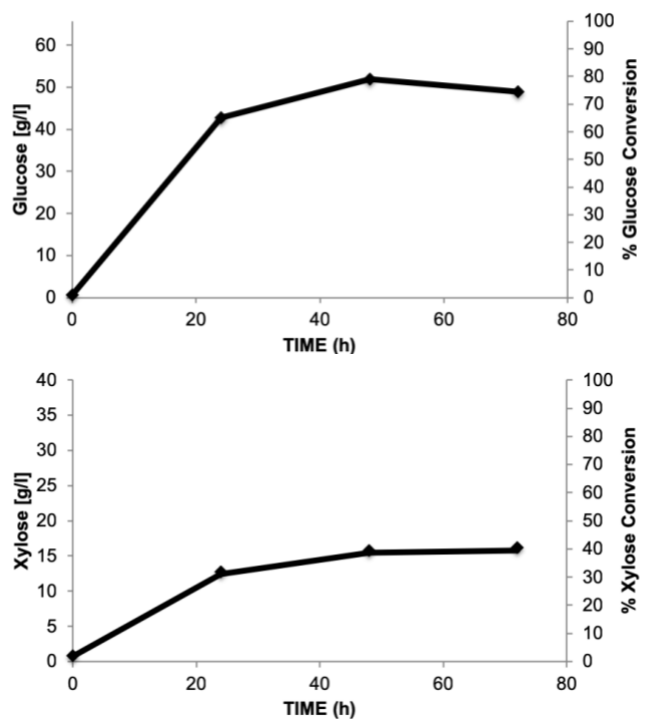

**Fig. S2** Sugar conversion during pretreatment process of sorghum biomass.

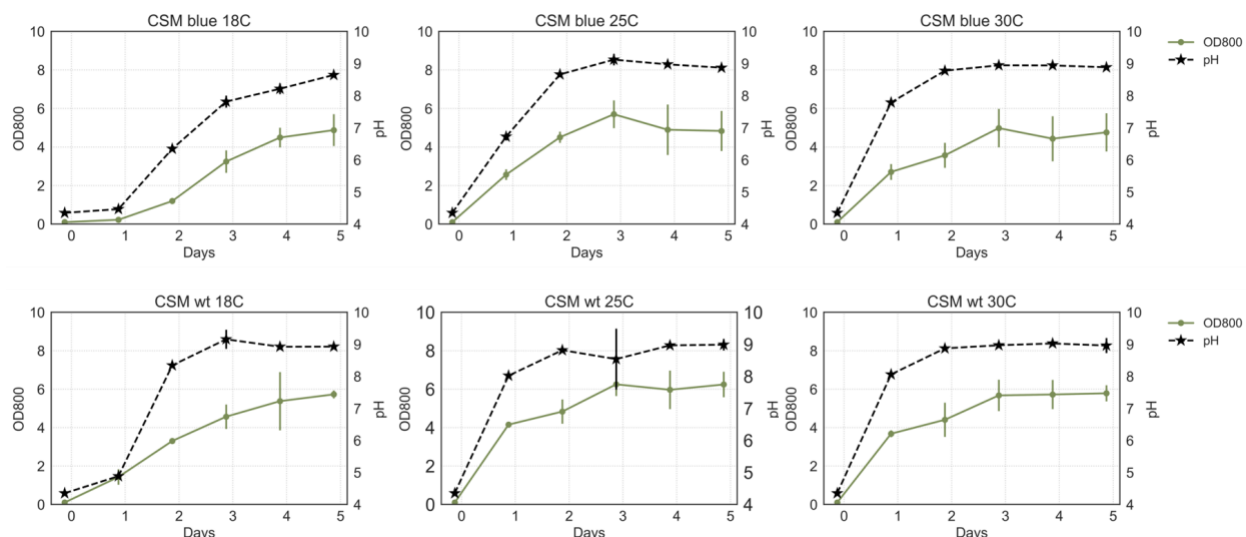

**Fig. S3** Growth profiles of BlueBelle (top) and IFO0880 (wt, bottom) in synthetic defined media cultivated at different temperatures. OD<sub>800</sub> values, depicted in green, and the culture pH shown as black rhombus, are plotted against time. Error bars represent SD of triplicates.

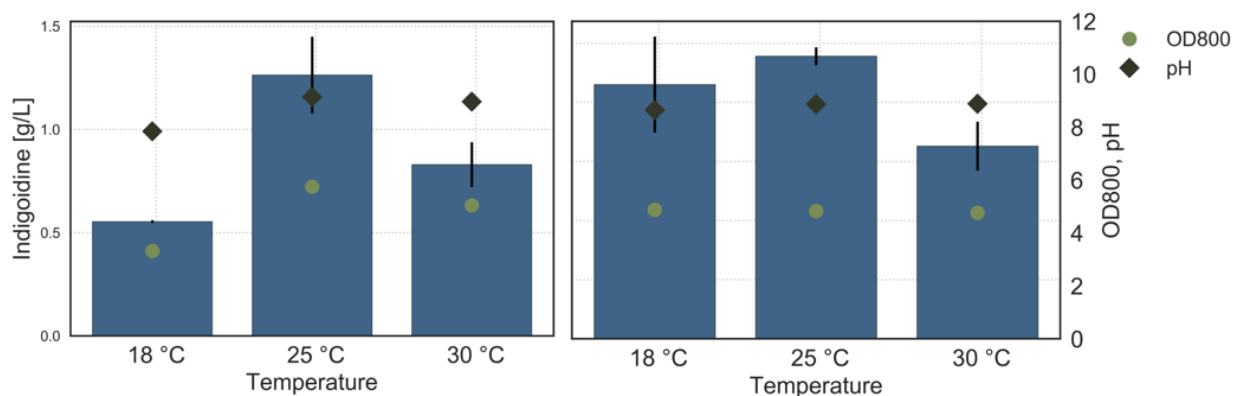

**Fig. S4** Production profile of indigoidine cultures after 3 days (left) and 5 days (right) of cultivation at different temperatures. Indigoidine concentrations (blue bars) OD<sub>800</sub> values (green dots) and culture pH (black rhombus) were measured. Error bars represent SD of 3 replicates.

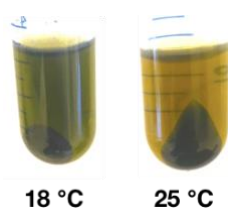

**Fig. S5** Coloration of supernatant after 5 days of cultivation at two different temperatures.

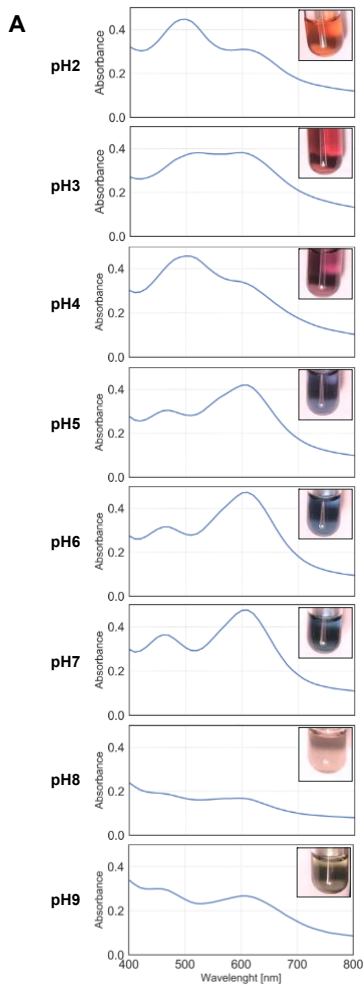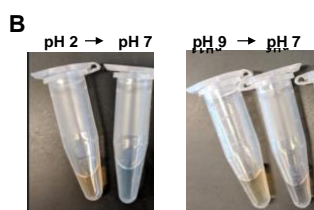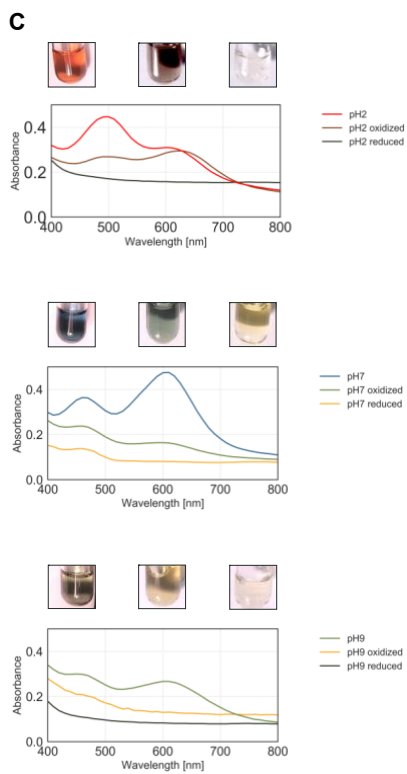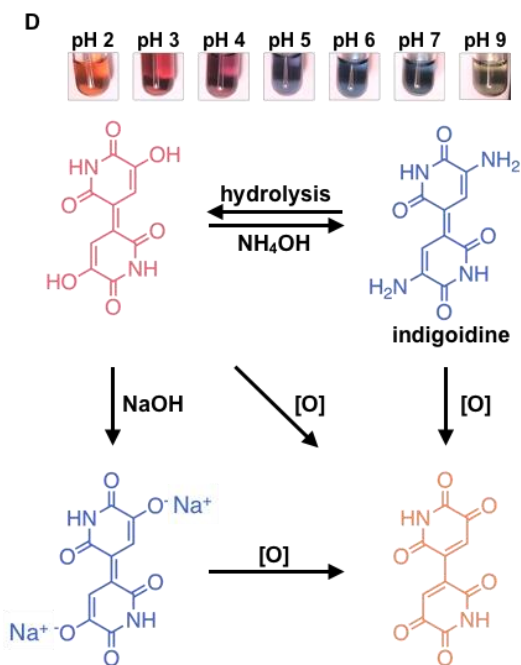

**Fig. S6** Effect of pH and redox state on hue of the solution. **A** UV-Vis spectra of indigoidine solutions with pH ranging from 9 to 2 in intervals of 1. **B** Re-adjustment of the pH from acidic (pH 2) and alkaline (pH 9) to neutral (pH 7). **C** UV-Vis spectra of indigoidine solutions at pH 2, 7 and 9 after oxidation with hydrogen peroxide and reduction with dithionite, respectively. **D Top** The solution of indigoidine displays an increasingly intense hue of red when the pH decreases. Representative solutions are shown. **Bottom** Structural derivatives of indigoidine observed in this study shown in corresponding colors. Indigoidine can undergo hydrolysis to yield a red pigment, hydroxyindigoidine ((*E*)-5,5'-dihydroxy-2*H*,2'*H*-[3,3'-bipyridinylidene]-2,2',6,6'(1*H*,1'*H*)-tetraone, top left), which can react with NH<sub>4</sub>OH to obtain indigoidine reversibly. Alternatively, hydroxyindigoidine can be deprotonated by NaOH and form a blue alkali metal adduct (bottom left). In the presence of air, any form of indigoidine (*i.e.* indigoidine and hydroxyindigoidine) can be oxidized to form a ketone, [3,3'-bipyridine]-2,2',5,5',6,6'(1*H*,1'*H*)-hexaone (bottom right), with a characteristic orange color. The depiction of structures is adapted from Kuhn *et al.*<sup>11</sup>

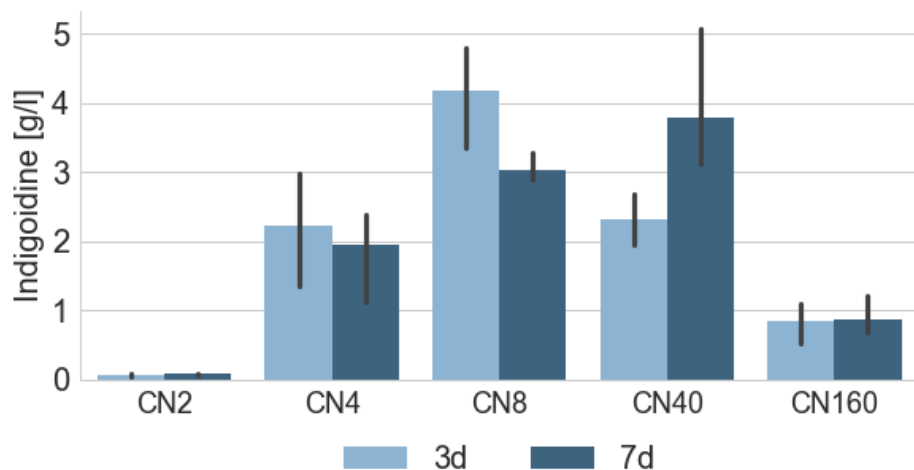

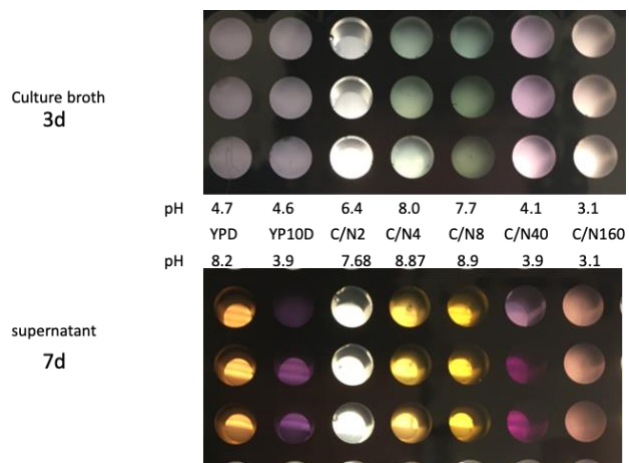

**Fig. S7 Top** Impact of C/N ratio on the indigoidine production and culture pH after 3 (light blue) and 7 days (dark blue) of cultivation using 100 g/L glucose and varying amounts of urea as carbon and nitrogen source respectively. Error bars represent SD of 3 replicates. **Bottom** Images of the culture broth after 3 days and the supernatant of the cultures after 7 days.

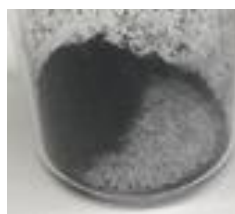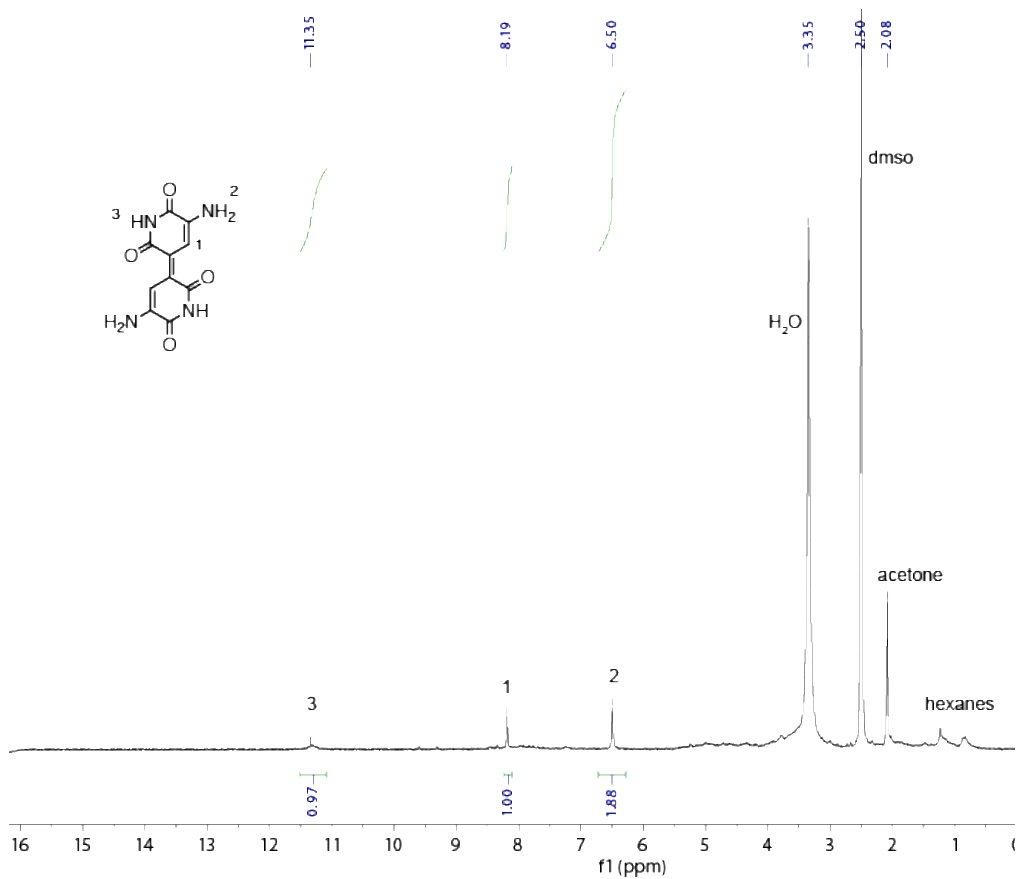

**Fig. S8 Left** After extraction and purification of indigoidine as described in the Experimental section, a dry powder was obtained. The picture shows the final product (400 mg dry Indigoidine) extracted and purified from 400 mL culture broth from a shake flask experiment using glucose as carbon source after 2.5 days at a concentration of 2 g/L. **Right** NMR analysis was performed to confirm the chemical structure and purity of the compound. Acetone and hexanes were used in the washing process.

#### **Table S1 Normalized Nitrogen sources**

The amount of nitrogen sources was calculated to the equivalent of 1.06 g nitrogen/L. For the complex nitrogen sources the following assumptions were made in agreement with manufacturer's description: Nitrogen content of Yeast extract = 10.9% (BD), peptone= 16% and of soy peptone = 8.1%.

| <b>Nitrogen Source</b> | <b>Amount</b> |
|------------------------|---------------|
| Ammonium sulfate       | 5 g/L         |
| Urea                   | 2.27 g/L      |
| Glutamine              | 5.53 g/L      |
| Glutamate              | 11.12 g/L     |
| Potassium nitrate      | 7.62 g/L      |
| Yeast extract          | 9.71 g/L      |
| Peptone                | 6.62 g/L      |
| Soy Peptone            | 13.07 g/L     |
